# 1 Capsule Networks but not Classic CNNs 2 Explain Global Visual Processing

3 Adrien Doerig<sup>a,†,\*</sup>, Lynn Schmittwilken<sup>a,†</sup>, Bilge Sayim<sup>b,c</sup>, Mauro Manassi<sup>d</sup> & Michael H. Herzog<sup>a</sup>

4 <sup>a</sup> Laboratory of Psychophysics, Brain Mind Institute, EPFL, Lausanne, 1015, Switzerland

5 <sup>b</sup> Institute of Psychology, University of Bern, 3012 Bern, Switzerland

6 <sup>c</sup> Univ. Lille, CNRS, UMR 9193- SCALab- Sciences Cognitives et Sciences Affectives, F-59000 Lille, France

7 <sup>d</sup> Department of Psychology, University of Aberdeen, Aberdeen, Scotland, UK

8 † Equal contributions

9 \* Corresponding author: [adrien.doerig@gmail.com](mailto:adrien.doerig@gmail.com)

10 Keywords: Vision, Neural Networks, Capsule Networks, Crowding, Global Shape Processing, Recurrent  
11 Processing

## 12 Abstract

13 Classically, visual processing is described as a cascade of local feedforward computations.  
14 Feedforward Convolutional Neural Networks (ffCNNs) have shown how powerful such models can be  
15 and revolutionized computer vision. However, ffCNNs only roughly mimic human vision. They lack  
16 recurrent connections and rely mainly on local features, contrary to humans who use global shape  
17 computations. Previously, using visual crowding as a well-controlled challenge, we showed that no  
18 classic model of vision, including ffCNNs, can explain human global shape processing (1). Here, we  
19 show that Capsule Neural Networks (CapsNets; 2), combining ffCNNs with a grouping and  
20 segmentation mechanism, solve this challenge in a natural manner. We hypothesize that one  
21 computational function of recurrence is to efficiently implement grouping and segmentation. We  
22 provide psychophysical evidence that, indeed, time-consuming recurrent processes implement  
23 complex grouping and segmentation in humans. CapsNets reproduce these results in a natural  
24 manner. Together, we provide mutually reinforcing psychophysical and computational evidence that  
25 a recurrent grouping and segmentation process is essential to understand the visual system and  
26 create better models that harness global shape computations.

27

## 28 Introduction

29 The visual system is often seen as a hierarchy of local feedforward computations (3), going back to  
30 the seminal work of Hubel and Wiesel (4). Low-level neurons detect basic features, such as edges.  
31 Higher-level neurons pool the outputs from the lower-level neurons to detect higher-level features  
32 such as corners, shapes, and ultimately objects. Feedforward Convolutional Neural Networks (ffCNNs)  
33 embody this classic framework of vision and excel at object detection (5). However, despite their  
34 amazing success, ffCNNs only roughly mimic human vision. For example, they lack the abundant  
35 recurrent processing of humans (6, 7), perform differently than humans in crucial psychophysical tasks  
36 (1, 8), and can be easily misled (9–11). Importantly, ffCNNs focus mainly on local, texture-like features,  
37 while humans harness global shape level computations (1, 11–15).

38 One difficulty in addressing these topics is that there are no widely accepted diagnostic tools to  
39 specifically characterize global shape level computations in neural networks. Models are usually  
40 compared either on computer vision benchmarks, such as ImageNet (16), or with neural responses in  
41 the visual system (17, 18). One drawback with these approaches is that the datasets are hard to  
42 control. Psychophysical results can be used to fill this gap and create well-controlled challenges for  
43 visual models, tailored to target specific aspects of vision (19). Here, we use visual crowding to target  
44 global shape computations in humans and machines.

45 In crowding, objects that are easy to identify in isolation seem jumbled and indistinct when clutter is  
46 added (1, 20–25). For example, a vernier target is presented, i.e., two vertical lines separated by a  
47 horizontal offset (Figure 1a). When the vernier is presented alone, observers easily discriminate the  
48 offset direction. When a flanking square surrounds the target, performance drops, i.e., there is strong  
49 crowding (26, 27). Surprisingly, *adding* more flanking squares *reduces* crowding strongly, depending  
50 on the configuration (Figure 1b; 25). This global, configurational *uncrowding* effect occurs for a wide  
51 range of stimuli in vision, including foveal and peripheral vision, audition, and haptics (28–34). The  
52 ubiquity of (un)crowding in perception is not surprising since elements are rarely seen in isolation.  
53 Hence, any perceptual system needs to cope with crowding, i.e., isolating important information from  
54 clutter.

55 We have shown previously that these global effects of crowding *cannot* be explained by models based  
56 on the classic framework of vision, including ffCNNs (1, 15, 35). Here, we propose a new framework  
57 to understand these global computations. We show that Capsule Neural Networks (CapsNets; 2),

58 augmenting ffcNNs with a recurrent grouping and segmentation process, can explain these complex  
 59 global (un)crowding results in a natural manner. Two processing regimes can occur in CapsNets: a fast  
 60 feedforward pass able to quickly process information, and a time-consuming recurrent regime to  
 61 perform more in depth global grouping and segmentation computations. We will show that the  
 62 human visual system indeed harnesses recurrent processing for efficient grouping and segmentation,  
 63 and that CapsNets naturally explain this result. Together, our results suggest that a time-consuming  
 64 recurrent grouping and segmentation process is crucial for shape-level computations in both humans  
 65 and artificial neural networks.  
 66

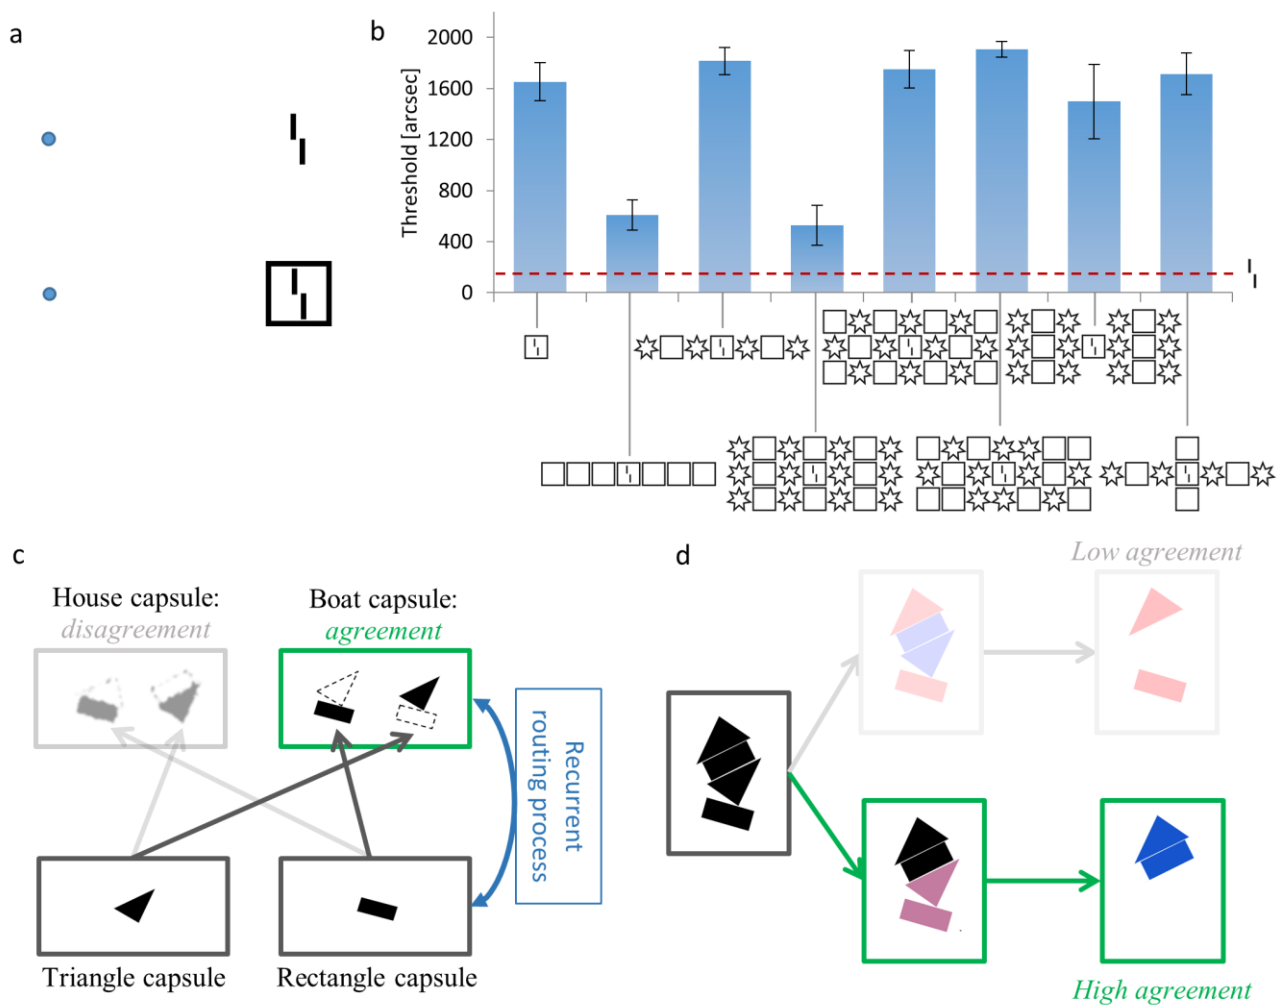

67  
 68 **Figure 1: a. Crowding:** Perception of visual elements deteriorates in clutter, an effect called crowding. In this example, a  
 69 vernier (two vertical bars with a horizontal offset) becomes harder to perceive when a square flanker is added (fixate on  
 70 the blue dots). **b. Uncrowding:** A vernier is presented in the visual periphery. The offset direction is easily reported (dashed  
 71 red line; the y-axis shows the threshold, i.e., the minimal offset size at which observers can report the offset direction with  
 72 75% accuracy). When a square flanker surrounds the vernier, performance deteriorates- a classic crowding effect. When  
 73 more squares are added, performance recovers (uncrowding). Critically, the uncrowding effect depends on the global

74 stimulus configuration. For example, if some squares are replaced by stars, performance deteriorates again (3<sup>rd</sup> bar; 25).  
75 **c. Routing by agreement in CapsNets:** Information propagates between layers of capsules through a recurrent routing  
76 process aiming to maximize agreement between capsules. Each capsule is a group of neurons whose activity vector  
77 represents the pose (such as position, orientation, etc.) of the feature it detects. In this toy example, lower-level capsules  
78 detect simple shapes such as triangles and rectangles. In the next layer, capsules have learnt combinations of these shapes.  
79 Here, the triangle capsule detects a tilted triangle and the rectangle capsule detects a tilted rectangle. Each of these  
80 capsules predicts what is represented at the next layer. For example, the triangle capsule predicts an upside-down house  
81 or a tilted boat, while the rectangle capsule predicts a tilted house or a tilted boat. The recurrent routing by agreement  
82 process routes information between the layers so that agreement is maximized. In this case, capsules agree about the  
83 titled boat, but disagree about the house orientation. Hence, the routing by agreement suppresses activity in the house  
84 capsule and boosts activity in the boat capsule. **d. Grouping and segmentation in CapsNets:** This recurrent routing by  
85 agreement process endows CapsNets with natural grouping and segmentation capabilities. Here, an ambiguous stimulus,  
86 which can be seen either as an upside-down house (top) or a house on a boat (bottom), is presented. The upside-down  
87 house interpretation leaves parts of the image unexplained and this causes disagreement. Hence, the routing by  
88 agreement will select the latter interpretations because it is the best explanation of the input and therefore maximizes  
89 agreement. Thereby, the house and boat are each grouped as an object and segmented into the corresponding higher-  
90 level capsules.

91

## 92 Results

### 93 Experiment 1: Crowding and Uncrowding Naturally Occur in CapsNets

94 In CapsNets, early convolutional layers extract basic visual features. Recurrent processing combines  
95 these features into groups and segments objects by a process called *routing by agreement*<sup>1</sup>. The en-  
96 tire network is trained end-to-end through backpropagation. *Capsules* are groups of neurons repre-  
97 senting visual features and are crucial for the routing by agreement process. Low-level capsules iter-  
98 atively predict the activity of high-level capsules in a recurrent loop. If the predictions agree, the cor-  
99 responding high-level capsule is activated. For example, if a capsule responds to a triangle above a  
100 rectangle detected by another capsule, they agree that the higher-level object should be a house and,  
101 therefore, the corresponding high-level capsule is activated (Figure 1c). This process allows CapsNets  
102 to group and segment objects (Figure 1d).

103 We trained CapsNets with two convolutional layers followed by two capsule layers to recognize  
104 greyscale images of vernier targets and groups of identical shapes (see Methods). During training,  
105 either a vernier or a group of identical shapes was presented. The network had to simultaneously

---

<sup>1</sup> In most implementations of CapsNets, including ours and (2), the iterative routing by agreement process is not explicitly implemented as a “standard” recurrent neural network processing sequences of inputs online. Instead, there is an iterative algorithmic loop (see (2) for the algorithm), which is equivalent to recurrent processing.

106 classify the shape type, the number of shapes in the group, and the vernier offset direction.  
107 Importantly, verniers and shapes were never presented together during training, i.e., there were no  
108 (un)crowding stimuli during training.

109 When combining verniers and shapes after training, both crowding and uncrowding occurred (Figure  
110 2a): presenting the vernier target within a single flanker deteriorated vernier offset discrimination  
111 (crowding), and adding more identical flankers recovered performance (uncrowding). Adding config-  
112 urations of alternating different flankers did not recover the network's performance, similarly to hu-  
113 man vision. Small changes in the network hyperparameters or stimulus characteristics do not affect  
114 these results (supplementary material). As a control condition, we checked that when the vernier  
115 target is presented outside the flanker configuration, rather than inside, there was no performance  
116 drop (supplementary material). Hence, the performance drop in crowded conditions was due to  
117 crowding and not merely to the simultaneous presence of the target and flanking shape in the stim-  
118 ulus.

119 Reconstructing the input image based on the network's output (see Methods) shows that (un)crowd-  
120 ing occurs through grouping and segmentation (figure 2b). Crowding occurs when the target and  
121 flankers cannot be segmented and are therefore routed to the same capsule. In this case, they inter-  
122 fere because a single capsule cannot represent well two objects simultaneously due to limited neural  
123 resources. This mechanism is similar to pooling: information about the target is pooled with infor-  
124 mation about the flankers, leading to poorer representations. However, if the flankers are segmented  
125 away and represented in a different capsule, the target is released from the flankers' deleterious ef-  
126 fects and *uncrowding* occurs (Figure 2c). This segmentation can only happen if the network has learnt  
127 to group the flankers into a single higher-level object represented in a different capsule than the ver-  
128 nier target. Segmentation is facilitated when more flankers are added because more low-level cap-  
129 sules agree about the presence of the flanker group.

130 Alternating configurations of different flankers, as in the third configuration of Figure 1b, usually do  
131 not lead to uncrowding (25). In some rare cases, the network produced uncrowding with such config-  
132 urations (stimuli h, u, v & J; Figure 2). Reconstructions show that in these cases the network simply  
133 could not differentiate between different shapes of the flankers (e.g. between circles and hexagons),  
134 and the flankers were segmented away from the target (Figure 2b). This further reinforces the notion  
135 that grouping and segmentation differentiate crowding from uncrowding: whenever the network  
136 reaches the conclusion that flankers form a group, segmentation is facilitated. When this happens,  
137 the vernier and flankers are represented in different capsules, leading to good performance.

138

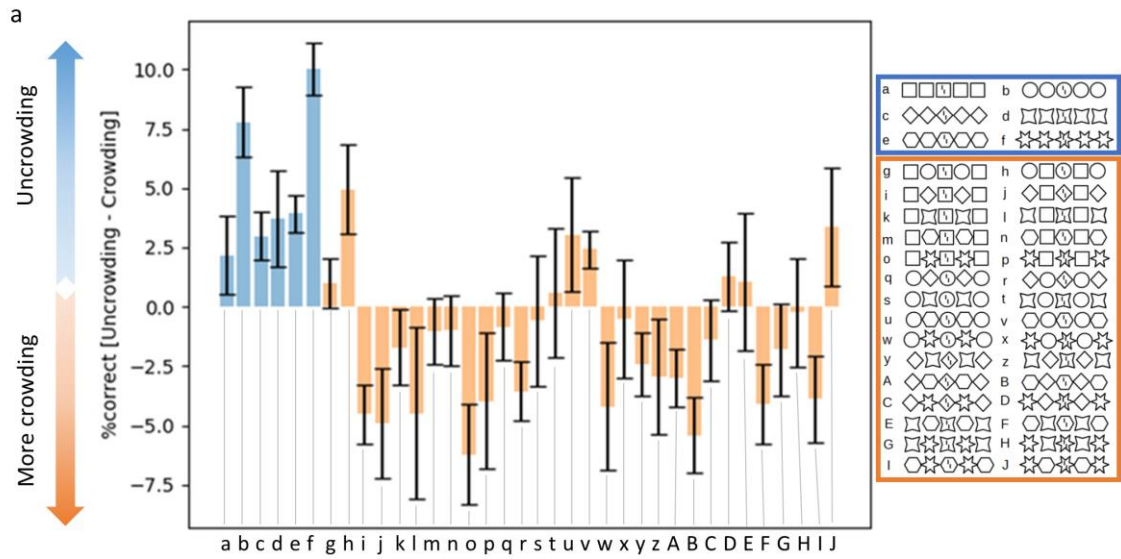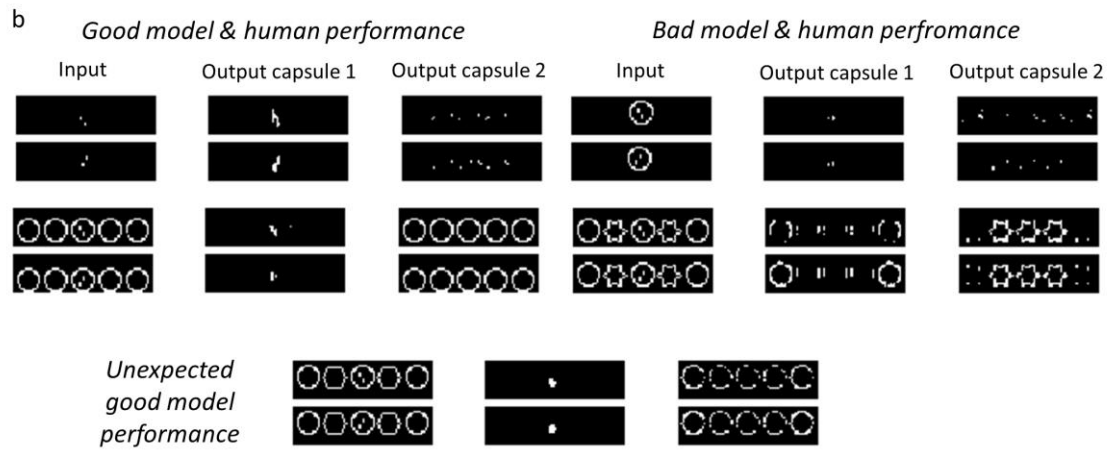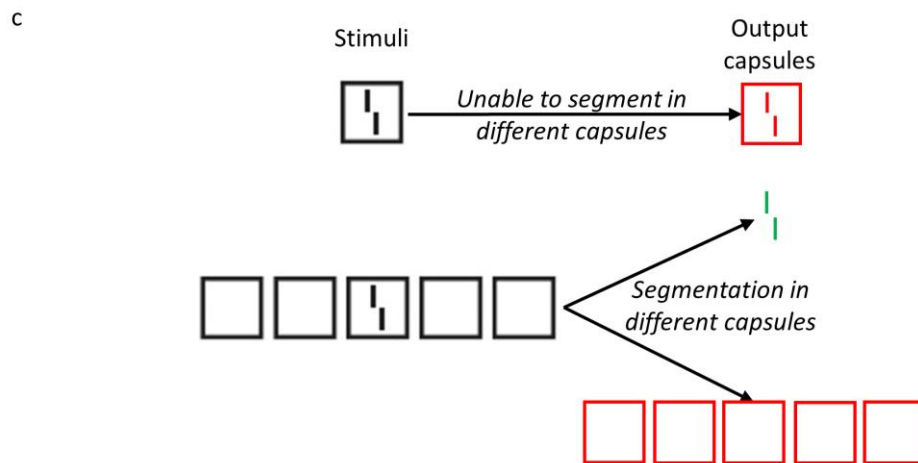

139

140 **Figure 2: a. CapsNets explain both crowding and uncrowding:** The x-axis shows the various stimuli. Performance is shown  
 141 on the y-axis as the % correct for each stimulus *minus* the % correct with only the central single flanker. For example, in  
 142 column *a*, vernier offset direction is easier to read out with 5 square flankers than with 1 square flanker, as expected. Error  
 143 bars are the standard error over 10 network trainings (we used 10 networks to match the typical number of observers in  
 144 human experiments; 25, 36). The blue bars represent configurations for which *uncrowding* is expected (blue bars larger

145 than 0.0 are in accordance with the human data) and orange bars represent configurations for which crowding is expected  
146 (orange bars smaller than or around 0.0 are in accordance with the human data). **b. Reconstructions:** We reconstructed  
147 the input image based on the output capsules' activities (see Methods). The reconstructions based on the two most  
148 activated capsules are shown. When the vernier is presented alone (top left), the reconstructions are good. When a single  
149 flanker is added (top right), the vernier reconstruction deteriorates (crowding) because the vernier is not well segmented  
150 from the flanker. When identical flankers are added (bottom left), the vernier reconstruction recovers, i.e., it is well seg-  
151 mented from the flankers (uncrowding). With different flankers (bottom right), the vernier is not represented at all in the  
152 two winning capsules (crowding). Interestingly, when the network produces "unexpected" uncrowding (i.e., the network  
153 shows uncrowding contrary to humans; bottom left), the reconstructions strongly resemble the case of "normal" un-  
154 crowding (compare middle and bottom left panels). In this case, the network was unable to notice the difference between  
155 circles and hexagons, and treated both stimuli in the same way. **c. Segmentation and (un)crowding in CapsNets:** If Cap-  
156 sNets can segment the vernier target away from the flankers during the recurrent routing by agreement process, un-  
157 crowding occurs. Segmentation is difficult when a single flanker surrounds the target because capsules disagree about  
158 what is shown at this location. In the case of configurations that the network has learned to group, many primary capsules  
159 agree about the presence of a group of shapes, which can therefore easily be segmented away from the vernier target.

160

## 161 Experiment 2: The role of recurrent processing

162 As mentioned, processing in CapsNets starts with a feedforward sweep followed by recurrent routing  
163 by agreement to refine grouping and segmentation. We hypothesize that humans may use recurrent  
164 processing to efficiently implement grouping and segmentation. To test this hypothesis, we psycho-  
165 physically investigated the temporal dynamics of (un)crowding. We show that uncrowding is mediated  
166 by a time-consuming *recurrent* process in humans. When the target groups with the flankers, crowd-  
167 ing occurs immediately. In contrast, when the target and flankers form separate groups, time-con-  
168 suming recurrent computations are required to segment the flanker from the target. We successfully  
169 model these results with CapsNets.

170 First, we performed a psychophysical crowding experiment with a vernier target flanked by either two  
171 lines or two cuboids (see Methods; Figure 3). The stimuli were displayed for varying durations from  
172 20 to 640ms and five observers reported the vernier offset direction. For short stimulus durations,  
173 crowding occurred for both flanker types, i.e., thresholds increased for both the lines and cuboids  
174 conditions compared to the vernier alone condition (lines:  $p = 0.0017$ , cuboids:  $p = 0.0013$ , 2-tailed  
175 one-sample t-tests).

176 We quantified how performance changed with increasing stimulus duration by fitting a line  $y = ax +$   
177  $b$  to the data for each subject, and comparing the mean slope  $a$  across subjects with 0 in one-sample  
178 2-tailed t-tests. The performance on the lines condition did not significantly change with increasing



179 stimulus duration ( $p = 0.057$ ). These results are in accordance with previous results which show that  
180 crowding varies very little with stimulus duration (37; but see 38, 39). With the flanking cuboids we  
181 found a different pattern of results: performance dramatically improves with stimulus duration ( $p =$   
182  $0.0007$ ). This improvement cannot be explained by local mechanisms, such as lateral inhibition (26,  
183 40) or pooling (41–43) since the inner flanking vertical lines are the same in the lines and cuboids.  
184 Hence, according to a local approach we should expect no difference in thresholds between the two  
185 flanking conditions.

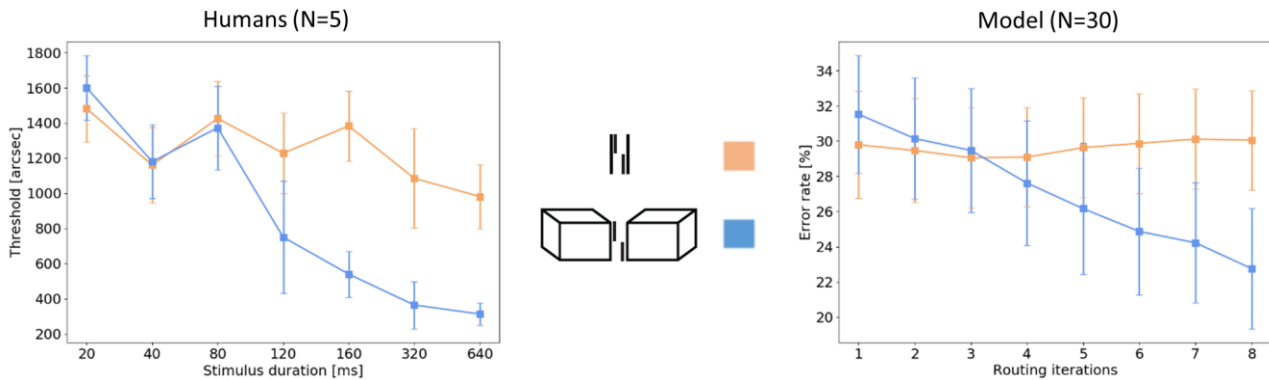

186  
187 **Figure 3: Temporal dynamics of uncrowding:** *Left: Human data.* For cuboid flankers, strong crowding occurs up to 100ms  
188 of stimulus presentation, and then uncrowding gradually occurs for longer durations (i.e., performance improves; blue).  
189 The x-axis shows different stimulus durations and the y-axis shows the corresponding thresholds (i.e., lower values indicate  
190 better performance). Error bars indicate standard error. Uncrowding does not occur with single line flankers, even for long  
191 stimulus durations (orange). We hypothesize that the cuboids are segmented from the vernier target through time-con-  
192 suming recurrent processing (the line flankers are grouped with the target and cannot be segmented at all). *Right: Model*  
193 *data.* CapsNets can explain these results by varying the number of recurrent routing by agreement iterations. The x-axis  
194 shows different numbers of routing iterations during testing and the y-axis shows the corresponding error rates (i.e., lower  
195 values indicate better performance). Error bars indicate standard deviation across 30 trained networks (see Methods).  
196 Similarly to humans, both lines and cuboids lead to crowding with few routing by agreement iterations. Performance  
197 increases with routing iterations only for the cuboids. This suggests that recurrent processing helps to compute and seg-  
198 ment the complex cuboids, but the lines are immediately strongly grouped with the vernier and can never be segmented.  
199 Hence, they do not benefit from the recurrent segmentation process.

200  
201 Crucially, uncrowding occurred for the cuboid flankers only when stimulus durations were sufficiently  
202 long (Figure 3). In contrast, the effect of the line flankers does not change over time. We propose that  
203 these results reflect the time-consuming recurrent computations needed to segment the cuboid  
204 flankers away from the target. Performance does not improve with the line flankers, because they are  
205 too strongly grouped with the vernier target, so recurrent processing cannot segment them away.



206 We trained CapsNets with the same architecture as in experiment 1 to discriminate vernier offsets,  
207 and to recognize lines, cuboids and scrambled cuboids (see Methods; the scrambled cuboids were  
208 included only to prevent the network from classifying lines vs. cuboids simply based on the number  
209 of pixels in the image). As in experiment 1, during training, each training sample contained one of the  
210 shape types, and the network had to classify which shape type was present and to discriminate the  
211 vernier offset direction. We used 8 routing by agreement iterations during training. As in experiment  
212 1, verniers and flankers were never presented together during training (i.e., there were no  
213 (un)crowding stimuli).

214 After training, we tested the networks on (un)crowding stimuli, changing the number recurrent rout-  
215 ing by agreement iterations from one (leading to a purely feedforward regime) to 8 iterations (a highly  
216 recurrent regime; Figure 3). We found that CapsNets naturally explain the human results. Using the  
217 same statistical analysis as for humans, we found that with more iterations, the cuboids are better  
218 segmented from the target, and performance improves ( $p = 0.003$ ). On the other hand, the effect of  
219 the line flankers does not change over time ( $p = 0.64$ ). These results were not affected by small  
220 changes in network hyperparameters (supplementary material).

221 These findings are explained by the recurrent routing by agreement process. With cuboids, capsules  
222 across an extended spatial region need to agree about the presence of a cuboid, which is then seg-  
223 mented into its own capsule. This complex process requires several recurrent iterations of the routing  
224 by agreement process. On the other hand, the lines are immediately strongly grouped with the vernier,  
225 so further iterations of routing by agreement do not achieve successful segmentation and, hence,  
226 cannot improve performance.

227

## 228 Discussion

229 Our results provide strong evidence that time-consuming recurrent grouping and segmentation is  
230 crucial for shape-level computations in both humans and artificial neural networks. We used  
231 (un)crowding as a psychophysical probe to investigate how the brain flexibly forms object  
232 representations. These results specifically target global, shape-level and time-consuming recurrent  
233 computations and constitute a well-controlled and difficult challenge for neural networks. It is well  
234 known that humans can solve a number of visual tasks very quickly, presumably in a single  
235 feedforward pass of neural activity (44). ffCNNs are good models of this kind of visual processing (17,  
236 18, 45). However, neural activities are not determined by the feedforward sweep alone. Recurrent

237 activity is crucial for several reasons (6, 7, 46–49). First, information computed at a higher level can  
238 affect processing of local elements (for example, global configurations of flankers can affect  
239 processing of the local vernier target via feedback). Second, although feedforward networks can in  
240 principle implement any function (50), recurrent networks can implement these functions more  
241 efficiently, by recycling neural resources (48). Third, recurrent networks have the advantage of  
242 affording two distinct processing regimes (6): a fast feedforward pass able to quickly process  
243 information, and a time-consuming recurrent regime to perform more in depth global computations.  
244 CapsNets naturally include both a fast feedforward and a time-consuming recurrent regime. When a  
245 single routing by agreement iteration is used, CapsNets are rapid feedforward networks that can ac-  
246 complish many tasks, such as vernier discrimination. With more routing iterations, a recurrent pro-  
247 cessing regime arises, and, with it, complex global shape effects emerge, such as computing and seg-  
248 menting the cuboids in experiment 2. We showed how these two regimes in CapsNets explain our  
249 psychophysical results about temporal dynamics of (un)crowding by showing how recurrent pro-  
250 cessing kicks in when complex global processing is needed.

251 One limitation in our experiments is that we explicitly taught the CapsNets which configurations to  
252 group together by selecting which groups of shapes were present during training (e.g., only groups of  
253 identical shapes in experiment 1). Effectively, this gave the network adequate priors to produce un-  
254 crowding with the appropriate configurations (i.e., only identical, but not different flankers). Hence,  
255 our results show that, given adequate priors, CapsNets explain uncrowding. We have shown previ-  
256 ously that ffCNNs do *not* produce uncrowding, *even* when they were similarly trained on groups of  
257 identical shapes and showed learning on the training data comparable to the CapsNets (15). This  
258 shows that merely training networks on groups of identical shapes is not sufficient to explain un-  
259 crowding. It is the recurrent segmentation in CapsNets that is crucial. Humans do not start from zero  
260 and therefore do not need to be trained in order to perform crowding tasks. The human brain is  
261 shaped through evolution and learning to group elements in a useful way to solve the tasks it faces.  
262 As mentioned, (un)crowding can be seen as a probe into this grouping strategy. Hence, we expect  
263 that training CapsNets on more naturalistic tasks such as ImageNet may lead to grouping strategies  
264 similar to humans and may therefore naturally equip the networks with priors that explain (un)crowd-  
265 ing results. At the moment, however, CapsNets have not been trained on such difficult tasks because  
266 the routing by agreement algorithm is computationally expensive.

267 Recurrent networks are harder to train than feedforward systems, which explains the dominance of  
268 the latter during these early days of deep learning. However, despite this hurdle, recurrent networks

269 are emerging to address the limitations of ffCNNs as models of the visual system (7, 46, 48, 49, 51,  
270 52). Our results suggest that one important role of recurrence is shape-level computations through  
271 grouping and segmentation. We had previously suggested another recurrent segmentation network,  
272 hard-wired to explain uncrowding (53). However, CapsNets, bringing together recurrent grouping and  
273 segmentation with the power of deep learning, are much more flexible and can be trained to solve  
274 any task. Linsley et al. (49) proposed another recurrent deep neural network for grouping and seg-  
275 mentation, and there are other possibilities too (54, 55). We do not suggest that CapsNets are the  
276 only implementation of grouping and segmentation.

277 In conclusion, our results provide mutually reinforcing modelling and psychophysical evidence that  
278 *time-consuming, recurrent* grouping and segmentation play a crucial role for global shape  
279 computations in humans. Recurrence kicks in when efficient grouping and segmentation of complex  
280 global shapes is required. We showed that CapsNets are a good model of this process. ffCNNs and  
281 other local feedforward models of vision, on the other hand, adopt a fundamentally different strategy  
282 for vision, which seems inadequate for human-like global shape computations.

283

## 284 Methods

285 The code to reproduce all our results will be available with the journal version of this contribution.

286 All models were implemented in Python 3.6, using the high-level estimator API of Tensorflow 1.10.0.  
287 Computations were run on a GPU (NVIDIA GeForce GTX 1070). We used the same basic network  
288 architecture in all experiments (Figure 4a). We implemented early feature extraction by using three  
289 convolutional layers without padding, each followed by an ELU non-linearity. We used dropout (56)  
290 after the first and second convolutional layers. The outputs of the last convolution were reshaped into  
291  $m$  primary capsule types outputting  $n$ -dimensional activation vectors. The number of output capsule  
292 types was equal to the number of different shapes used as input. The network was trained end-to-  
293 end through backpropagation. For training, we used an Adam optimizer with a batch size of 48 and a  
294 learning rate of 0.0004. To this learning rate, we applied cosine decays with warm restarts (57).

295 This choice of network architecture was motivated by the following rationale (Figure 4b). After  
296 training, ideally, primary capsules detect the individual shapes present in the input image, and output  
297 capsules group and segment these shapes through recurrent routing by agreement. The network can  
298 only group shapes together if it was taught during training that these shapes should form a group. To

299 match this rationale, we set the primary capsules' receptive field sizes to roughly the size of one shape,  
 300 and we set the number of output capsules equal to the number of shape types.

301 Inputs were grayscale images (Figure 4c&d). We added random Gaussian noise with mean  $\mu = 0$  and  
 302 standard deviation randomly drawn from a uniform distribution  $\sigma \sim \mathcal{U}(0.00, 0.02)$ . The contrast was  
 303 varied either by first adding a random value between -0.1 and 0.1 to all pixel values and then  
 304 multiplying them with a random value drawn from a uniform distribution  $\mathcal{U}(0.6, 1.2)$ , or vice versa.  
 305 The pixel values were then clipped between 0 and 1.

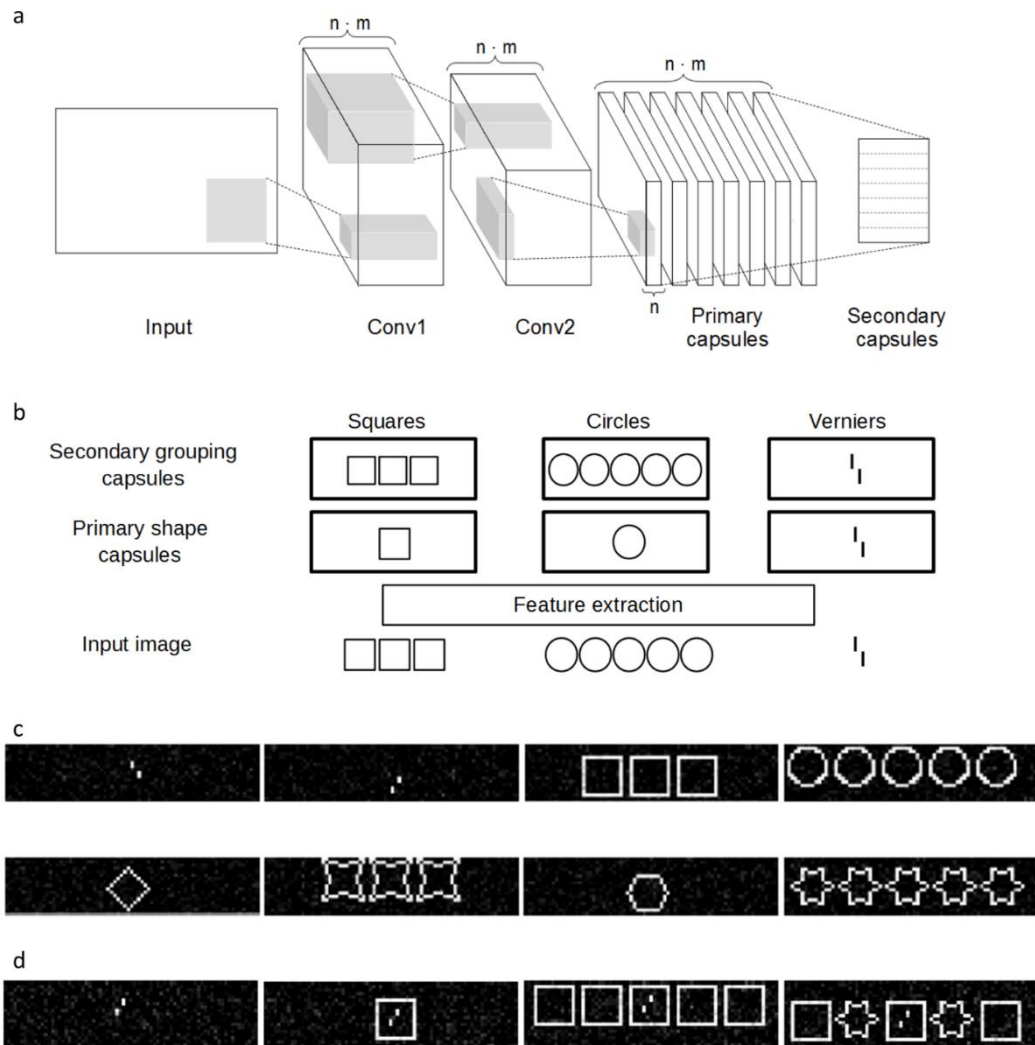

306

307 **Figure 4: a. Network architecture:** We used capsule networks with three convolutional layers whose last outputs was  
 308 reshaped into the primary capsule layer with  $m$  primary capsule types and  $n$  primary capsule dimensions. In this example,  
 309 the number of primary and output capsule types is seven to match the seven shape types we used in experiment 1 (see  
 310 caption c), but the number depended on the experiment. The primary and output capsule layers communicate via routing-  
 311 by-agreement. **b. Ideal representations:** After training, the primary capsules detect single shapes of different types at  
 312 different locations. In this example, there are squares, circles and verniers. By routing the outputs of the primary capsules  
 313 to the corresponding output capsules, the output capsules group these shapes in groups of one, three or five, based on  
 314 the number of shapes detected by the primary capsules. If the left stimulus with three squares is presented, the primary

315 square capsules detect squares at three different locations. Through routing by agreement, the output squares capsule  
316 groups these three squares. If the middle stimulus with five circles is presented, the primary circle capsules detect circles  
317 at five different locations. Through routing by agreement, the output circles capsule represents a group of five circles after  
318 routing. Lastly, if a vernier is presented (right stimulus), it is detected by primary capsules and is represented in the vernier  
319 output capsule. **c. Training stimuli for experiment 1:** All shapes were shown randomly in groups of one, three or five,  
320 except verniers who were always presented alone. **d. Testing stimuli for experiment 1:** Example stimuli for the four test  
321 conditions: In the vernier-alone condition (*left*), we expected the network to perform well on the vernier discrimination  
322 task. In crowding conditions (*middle-left*), we expected a deterioration of the vernier discrimination as in classical crowding.  
323 In uncrowding conditions with many identical flankers (*middle-right*), we expected a recovery of the vernier discrimination.  
324 In no-uncrowding conditions with different flanker types (*right*), we expected crowding. After training, the network has  
325 learnt about groups of identical shapes and verniers, but has never encountered these (un)crowding stimuli.

326

## 327 Experiment 1:

### 328 Modelling

329 Human data for experiment 1 is based on (25). We trained CapsNets with the above architecture to  
330 solve a vernier offset discrimination task and classify groups of identical shapes. The training dataset  
331 included vernier stimuli and six different shape types (Figure 4c). Shapes were presented in groups of  
332 one, three or five shapes of the same type. The group was centered in the middle of the image, with  
333 a jitter of 2 pixels along the x-axis and 6 pixels along the y-axis.

334 The loss function included a term for shape type classification, a term for vernier offset discrimination,  
335 a term for the number of shapes in the image, and a term for reconstructing the input based on the  
336 network output (see equations 1-5). Each loss term was scaled so that none of the terms dominated  
337 the others. For the shape type classification loss, we implemented the same margin loss as in (2). This  
338 loss enables the detection of multiple objects in the same image. For the vernier offset loss, we used  
339 a small decoder to determine vernier offset directions based on the activity of the vernier output  
340 capsule. The decoder was composed of a single dense hidden layer followed by a ReLU-nonlinearity  
341 and a dense readout layer of two nodes corresponding to the labels left and right. The vernier offset  
342 loss was computed as the softmax cross entropy between the decoder output and the one-hot-en-  
343 coded vernier offset labels. The loss term for the number of shapes in the image was implemented  
344 similarly, but the output layer comprised three nodes representing the labels one, three or five shape  
345 repetitions. For the reconstruction loss, we trained a decoder with two fully-connected hidden layers  
346 (h1: 512 units, h2: 1024 units) each followed by ELU nonlinearities to reconstruct the input image.  
347 The reconstruction loss was then calculated as the squared difference between the pixel values of the  
348 input image and the reconstructed image. The total loss is given by the following formulas:

$$L_{total} = \alpha_{shape\ type} L_{shape\ type} + \alpha_{vernier\ offset} L_{vernier\ offset} + \alpha_{shape\ repetitions} L_{shape\ repetitions} + \alpha_{reconstruction} L_{reconstruction} \quad (1)$$

$$L_{shape\ type} = \sum_k T_k \max(0, (m^+ - \|v_k\|)^2) + \lambda(1 - T_k) \max(0, (\|v_k\| - m^-)^2) \quad (2)$$

$$L_{vernier\ offset} = \text{Crossentropy}(\text{vernier labels}, \text{vernier decoder output}) \quad (3)$$

$$L_{shape\ repetitions} = \text{Crossentropy}(\text{shape repetitions labels}, \text{shape repetitions decoder output}) \quad (4)$$

$$L_{reconstruction} = \sum_{i,j} (\text{input}(i,j) - \text{reconstruction}(i,j))^2 \quad (5)$$

Where the  $\alpha$  are real numbers scaling each loss term,  $T_k = 1$  if shape class  $k$  is present,  $\|v_k\|$  is the norm of output capsule  $k$ , and  $m^+$ ,  $m^-$  and  $\lambda$  are parameters of the margin loss with the same values as described in (2).

After training, we tested vernier discrimination performance on (un)crowding stimuli (figure 4d), and obtained input reconstructions. We trained 10 different networks and averaged their performance. Before this experiment, the network had never seen crowding nor uncrowding stimuli, but it knew about groups of shapes and about the vernier discrimination task. Therefore, the network could not trivially learn when to (un)crowd by overfitting on the training dataset. This situation is similar for humans: they know about shapes and verniers, but their visual system has never been trained on (un)crowding stimuli.

366

## 367 Experiment 2:

### 368 Psychophysical experiment:

#### 369 Observers

370 For experiment 2, we collected human psychophysical data. Participants were paid students of the  
371 Ecole Polytechnique Fédérale de Lausanne (EPFL). All had normal or corrected-to-normal vision, with  
372 a visual acuity of 1.0 (corresponding to 20/20) or better in at least one eye, measured with the Frei-  
373 burg Visual Acuity Test. Observers were told that they could quit the experiment at any time they  
374 wished. Five observers (two females) performed the experiment.

#### 375 Apparatus and stimuli

376 Stimuli were presented on a HP-1332A XY-display equipped with a P11 phosphor and controlled by a  
377 PC via a custom-made 16-bit DA interface. Background luminance of the screen was below 1 cd/m<sup>2</sup>.  
378 Luminance of stimuli was 80 cd/m<sup>2</sup>. Luminance measurements were performed using a Minolta Lu-  
379 minance meter LS-100. The experimental room was dimly illuminated (0.5 lx). Viewing distance was  
380 75 cm.

381 We determined vernier offset discrimination thresholds for different flanker configurations. The ver-  
382 nier target consisted of two lines that were randomly offset either to the left or right. Observers indi-  
383 cated the offset direction. Stimulus consisted of two vertical 40' (arcmin) long lines separated by a  
384 vertical gap of 4' and presented at an eccentricity of 5° to the right of a fixation cross (6' diameter).  
385 Eccentricity refers to the center of the target location. Flanker configurations were centered on the  
386 vernier stimulus and were symmetrical in the horizontal dimension. Observers were presented two  
387 flanker configurations. In the lines configuration, the vernier was flanked by two vertical lines (84') at  
388 40' from the vernier. In the cuboids configuration, perspective cuboids were presented to the left and  
389 to the right of the vernier (width = 58', angle of oblique lines = 135°, length = 23.33'). Cuboids con-  
390 tained the lines from the Lines condition as their centermost edge.

#### 391 *Procedure*

392 Observers were instructed to fixate a fixation cross during the trial. After each response, the screen  
393 remained blank for a maximum period of 3 s during which the observer was required to make a re-  
394 sponse on vernier offset discrimination by pressing one of two push buttons. The screen was blank  
395 for 500 ms between response and the next trial.

396 An adaptive staircase procedure (PEST; 58) was used to determine the vernier offset for which ob-  
397 servers reached 75% correct responses. Thresholds were determined after fitting a cumulative Gauss-  
398 ian to the data using probit and likelihood analyses. In order to avoid extremely large vernier offsets,  
399 we restricted the PEST procedure to not exceed 33.3' i.e. twice the starting value of 16.66'. Each con-  
400 dition was presented in separate blocks of 80 trials. All conditions were measured twice (i.e., 160  
401 trials) and randomized individually for each observer. To compensate for possible learning effects, the  
402 order of conditions was reversed after each condition had been measured once. Auditory feedback  
403 was provided after incorrect or omitted responses.

#### 404 **Modelling:**

405 To model the results of experiment 2, we trained our CapsNets to solve a vernier offset discrimination  
406 task and classify verniers, cuboids, scrambled cuboids and lines. The training dataset included vernier  
407 stimuli and one of three different shape types (lines, cuboids, scrambled cuboids). The scrambled



408 cuboids were included to make the task harder, and to prevent the network from classifying cuboids  
409 simply based on the number of pixels in the image. The line stimuli were randomly presented in a  
410 group of 2, 4, 6 or 8. Both, cuboids and shuffled cuboids were always presented in groups of two  
411 facing one another. The distance between these shapes was varied randomly between one and six  
412 pixels. The loss function was very similar to experiment 1, but without the loss term for shape repeti-  
413 tions, since there were no repetitions (each term is the same as in eqs. 1-5):

$$414 \quad L_{total} = \alpha_{shape\ type} L_{shape\ type} + \alpha_{vernier\ offset} L_{vernier\ offset} + \alpha_{reconstruction} L_{reconstruction} \quad (6)$$

415 After training, we tested the network's vernier discrimination performance on (un)crowding stimuli  
416 (verniers surrounded by either lines, cuboids or scrambled cuboids), while varying the number of  
417 recurrent routing by agreement iterations. We trained the same network 50 times and averaged per-  
418 formance over these trained networks, excluding 21 networks for which vernier discrimination per-  
419 formance with *both* line and cuboid flankers was at ceiling ( $\geq 95\%$ ) or floor ( $\leq 55\%$ ). This exclusion  
420 criterion is used for cleaner results and does *not* impact the crucial result showing that uncrowding  
421 occurs with increasing routing iterations only with cuboid, but not with line flankers. The effect still  
422 occurs when all 50 networks are included in the analysis, but the fact that certain networks are at  
423 floor or ceiling is misleading. Before this experiment, the network had never seen (un)crowding stim-  
424 uli, but it knew about cuboids, scrambled cuboids and about the vernier discrimination task. There-  
425 fore, the network could not trivially learn when to (un)crowd by overfitting on the training dataset.

426

## 427 Acknowledgements

428 Adrien Doerig was supported by the Swiss National Science Foundation grant n.176153 "Basics of  
429 visual processing: from elements to figures".

430

## 431 Bibliography

- 432 1. Doerig A, et al. (2019) Beyond Bouma's window: How to explain global aspects of crowding?  
433 *PLOS Computational Biology* 15(5):e1006580.
- 434 2. Sabour S, Frosst N, Hinton GE (2017) Dynamic routing between capsules. *Advances in Neural*  
435 *Information Processing Systems*, pp 3856–3866.
- 436 3. DiCarlo JJ, Zoccolan D, Rust NC (2012) How Does the Brain Solve Visual Object Recognition?  
437 *Neuron* 73(3):415–434.
- 438 4. Hubel DH, Wiesel TN (1962) Receptive fields, binocular interaction and functional architecture  
439 in the cat's visual cortex. *The Journal of physiology* 160(1):106–154.

- 440 5. Krizhevsky A, Sutskever I, Hinton GE (2012) Imagenet classification with deep convolutional  
441 neural networks. *Advances in Neural Information Processing Systems*, pp 1097–1105.
- 442 6. Lamme VA, Roelfsema PR (2000) The distinct modes of vision offered by feedforward and  
443 recurrent processing. *Trends in neurosciences* 23(11):571–579.
- 444 7. Kietzmann TC, et al. (2019) Recurrence required to capture the dynamic computations of the  
445 human ventral visual stream. *arXiv preprint arXiv:190305946*.
- 446 8. Funke CM, et al. (2018) Comparing the ability of humans and DNNs to recognise closed contours  
447 in cluttered images. *18th Annual Meeting of the Vision Sciences Society (VSS 2018)*, p 213.
- 448 9. Su J, Vargas DV, Sakurai K (2019) One pixel attack for fooling deep neural networks. *IEEE*  
449 *Transactions on Evolutionary Computation*.
- 450 10. Szegedy C, et al. (2013) Intriguing properties of neural networks. *arXiv preprint arXiv:13126199*.
- 451 11. Geirhos R, et al. (2018) ImageNet-trained CNNs are biased towards texture; increasing shape  
452 bias improves accuracy and robustness. *arXiv preprint arXiv:181112231*.
- 453 12. Baker N, Lu H, Erlikhman G, Kellman PJ (2018) Deep convolutional networks do not classify  
454 based on global object shape. *PLoS computational biology* 14(12):e1006613.
- 455 13. Brendel W, Bethge M (2019) Approximating CNNs with Bag-of-local-Features models works  
456 surprisingly well on ImageNet. *arXiv preprint arXiv:190400760*.
- 457 14. Kim T, Bair W, Pasupathy A (2019) Neural coding for shape and texture in macaque area V4.  
458 *Journal of Neuroscience* 39(24):4760–4774.
- 459 15. Doerig A, Bornet A, Choung OH, Herzog MH (2019) Crowding Reveals Fundamental Differences  
460 in Local vs. Global Processing in Humans and Machines. *bioRxiv:744268*.
- 461 16. Deng J, et al. (2009) Imagenet: A large-scale hierarchical image database. *2009 IEEE Conference*  
462 *on Computer Vision and Pattern Recognition (Ieee)*, pp 248–255.
- 463 17. Khaligh-Razavi S-M, Kriegeskorte N (2014) Deep supervised, but not unsupervised, models may  
464 explain IT cortical representation. *PLoS computational biology* 10(11):e1003915.
- 465 18. Yamins DL, et al. (2014) Performance-optimized hierarchical models predict neural responses in  
466 higher visual cortex. *Proceedings of the National Academy of Sciences* 111(23):8619–8624.
- 467 19. RichardWebster B, Anthony S, Scheirer W (2018) Psyphy: A psychophysics driven evaluation  
468 framework for visual recognition. *IEEE transactions on pattern analysis and machine*  
469 *intelligence*.
- 470 20. Levi DM (2008) Crowding—An essential bottleneck for object recognition: A mini-review. *Vision*  
471 *Research* 48(5):635–654.
- 472 21. Whitney D, Levi DM (2011) Visual crowding: a fundamental limit on conscious perception and  
473 object recognition. *Trends in Cognitive Sciences* 15(4):160–168.

- 474 22. Bouma H (1973) Visual interference in the parafoveal recognition of initial and final letters of  
475 words. *Vision Research* 13(4):767–782.
- 476 23. Pelli DG (2008) Crowding: a cortical constraint on object recognition. *Current Opinion in*  
477 *Neurobiology* 18(4):445–451.
- 478 24. Manassi M, Whitney D (2018) Multi-level Crowding and the Paradox of Object Recognition in  
479 Clutter. *Current Biology* 28(3):R127–R133.
- 480 25. Manassi M, Lonchamp S, Clarke A, Herzog MH (2016) What crowding can tell us about object  
481 representations. *Journal of Vision* 16(3):35–35.
- 482 26. Westheimer G, Hauske G (1975) Temporal and spatial interference with vernier acuity. *Vision*  
483 *research* 15(10):1137–1141.
- 484 27. Levi DM, Klein SA, Aitsebaomo AP (1985) Vernier acuity, crowding and cortical magnification.  
485 *Vision research* 25(7):963–977.
- 486 28. Oberfeld D, Stahn P (2012) Sequential grouping modulates the effect of non-simultaneous  
487 masking on auditory intensity resolution. *PloS one* 7(10):e48054.
- 488 29. Overvliet KE, Sayim B (2016) Perceptual grouping determines haptic contextual modulation.  
489 *Vision Research* 126(Supplement C):52–58.
- 490 30. Saarela TP, Sayim B, Westheimer G, Herzog MH (2009) Global stimulus configuration modulates  
491 crowding. *Journal of Vision* 9(2):5–5.
- 492 31. Herzog MH, Fahle M (2002) Effects of grouping in contextual modulation. *Nature*  
493 415(6870):433.
- 494 32. Sayim B, Westheimer G, Herzog MH (2010) Gestalt factors modulate basic spatial vision.  
495 *Psychological Science* 21(5):641–644.
- 496 33. Saarela TP, Westheimer G, Herzog MH (2010) The effect of spacing regularity on visual crowding.  
497 *Journal of Vision* 10(10):17–17.
- 498 34. Manassi M, Sayim B, Herzog MH (2012) Grouping, pooling, and when bigger is better in visual  
499 crowding. *Journal of Vision* 12(10):13–13.
- 500 35. Pachai MV, Doerig AC, Herzog MH (2016) How best to unify crowding? *Current Biology*  
501 26(9):R352–R353.
- 502 36. Manassi M, Sayim B, Herzog MH (2013) When crowding of crowding leads to uncrowding.  
503 *Journal of Vision* 13(13):10–10.
- 504 37. Wallace JM, Chiu MK, Nandy AS, Tjan BS (2013) Crowding during restricted and free viewing.  
505 *Vision Research* 84:50–59.
- 506 38. Tripathy SP, Cavanagh P, Bedell HE (2014) Large crowding zones in peripheral vision for briefly  
507 presented stimuli. *Journal of Vision* 14(6):11–11.

- 508 39. Styles EA, Allport DA (1986) Perceptual integration of identity, location and colour. *Psychological*  
509 *Research* 48(4):189–200.
- 510 40. Li Z (1999) Visual segmentation by contextual influences via intra-cortical interactions in the  
511 primary visual cortex. *Network: computation in neural systems* 10(2):187–212.
- 512 41. Parkes L, Lund J, Angelucci A, Solomon JA, Morgan M (2001) Compulsory averaging of crowded  
513 orientation signals in human vision. *Nature neuroscience* 4(7):739.
- 514 42. Pelli DG, Palomares M, Majaj NJ (2004) Crowding is unlike ordinary masking: Distinguishing  
515 feature integration from detection. *Journal of Vision* 4(12):12–12.
- 516 43. Rosenholtz R, Yu D, Keshvari S (2019) Challenges to pooling models of crowding: Implications for  
517 visual mechanisms. *Journal of vision* 19(7).
- 518 44. Thorpe S, Fize D, Marlot C (1996) Speed of processing in the human visual system. *nature*  
519 381(6582):520.
- 520 45. Kietzmann TC, McClure P, Kriegeskorte N (2018) Deep neural networks in computational  
521 neuroscience. *bioRxiv*:133504.
- 522 46. Kim J, Linsley D, Thakkar K, Serre T (2019) Disentangling neural mechanisms for perceptual  
523 grouping. *arXiv preprint arXiv:190601558*.
- 524 47. Tang H, et al. (2018) Recurrent computations for visual pattern completion. *Proceedings of the*  
525 *National Academy of Sciences* 115(35):8835–8840.
- 526 48. Spoerer CJ, Kietzmann TC, Kriegeskorte N (2019) Recurrent networks can recycle neural  
527 resources to flexibly trade speed for accuracy in visual recognition. *bioRxiv*:677237.
- 528 49. Linsley D, Kim J, Serre T (2018) Sample-efficient image segmentation through recurrence.  
529 *arXiv:181111356 [cs]*. Available at: <http://arxiv.org/abs/1811.11356> [Accessed June 27, 2019].
- 530 50. Hornik K, Stinchcombe M, White H (1989) Multilayer feedforward networks are universal  
531 approximators. *Neural networks* 2(5):359–366.
- 532 51. Spoerer CJ, McClure P, Kriegeskorte N (2017) Recurrent convolutional neural networks: a better  
533 model of biological object recognition. *Frontiers in psychology* 8:1551.
- 534 52. Kar K, Kubilius J, Schmidt K, Issa EB, DiCarlo JJ (2019) Evidence that recurrent circuits are critical  
535 to the ventral stream’s execution of core object recognition behavior. *Nature neuroscience*  
536 22(6):974.
- 537 53. Francis G, Manassi M, Herzog MH (2017) Neural dynamics of grouping and segmentation  
538 explain properties of visual crowding. *Psychological review* 124(4):483.
- 539 54. Ronneberger O, Fischer P, Brox T (2015) U-net: Convolutional networks for biomedical image  
540 segmentation. *International Conference on Medical Image Computing and Computer-Assisted*  
541 *Intervention* (Springer), pp 234–241.
- 542 55. Girshick R, Radosavovic I, Gkioxari G, Dollár P, He K (2018) *Detectron*.

- 543 56. Srivastava N, Hinton G, Krizhevsky A, Sutskever I, Salakhutdinov R (2014) Dropout: a simple way  
544 to prevent neural networks from overfitting. *The Journal of Machine Learning Research*  
545 15(1):1929–1958.
- 546 57. Loshchilov I, Hutter F (2016) Sgdr: Stochastic gradient descent with warm restarts. *arXiv preprint*  
547 *arXiv:160803983*.
- 548 58. Taylor M, Creelman CD (1967) PEST: Efficient estimates on probability functions. *The Journal of*  
549 *the Acoustical Society of America* 41(4A):782–787.
- 550
- 551

552 **Supplementary Material**

553 **Experiment 1**

554 *Results are robust against stimuli and hyperparameters changes*

555 To avoid cherry-picking our hyperparameters, we ran several networks with different hyperparameter  
 556 sets, and show that our results are robust with respect to these changes.

557 The results of experiment 1 remain qualitatively similar for different image sizes and network  
 558 hyperparameters. Below is a selection of results using different sets of hyperparameters. In all these  
 559 cases, both crowding and uncrowding occur, similarly to the results shown in Figure 2.

560

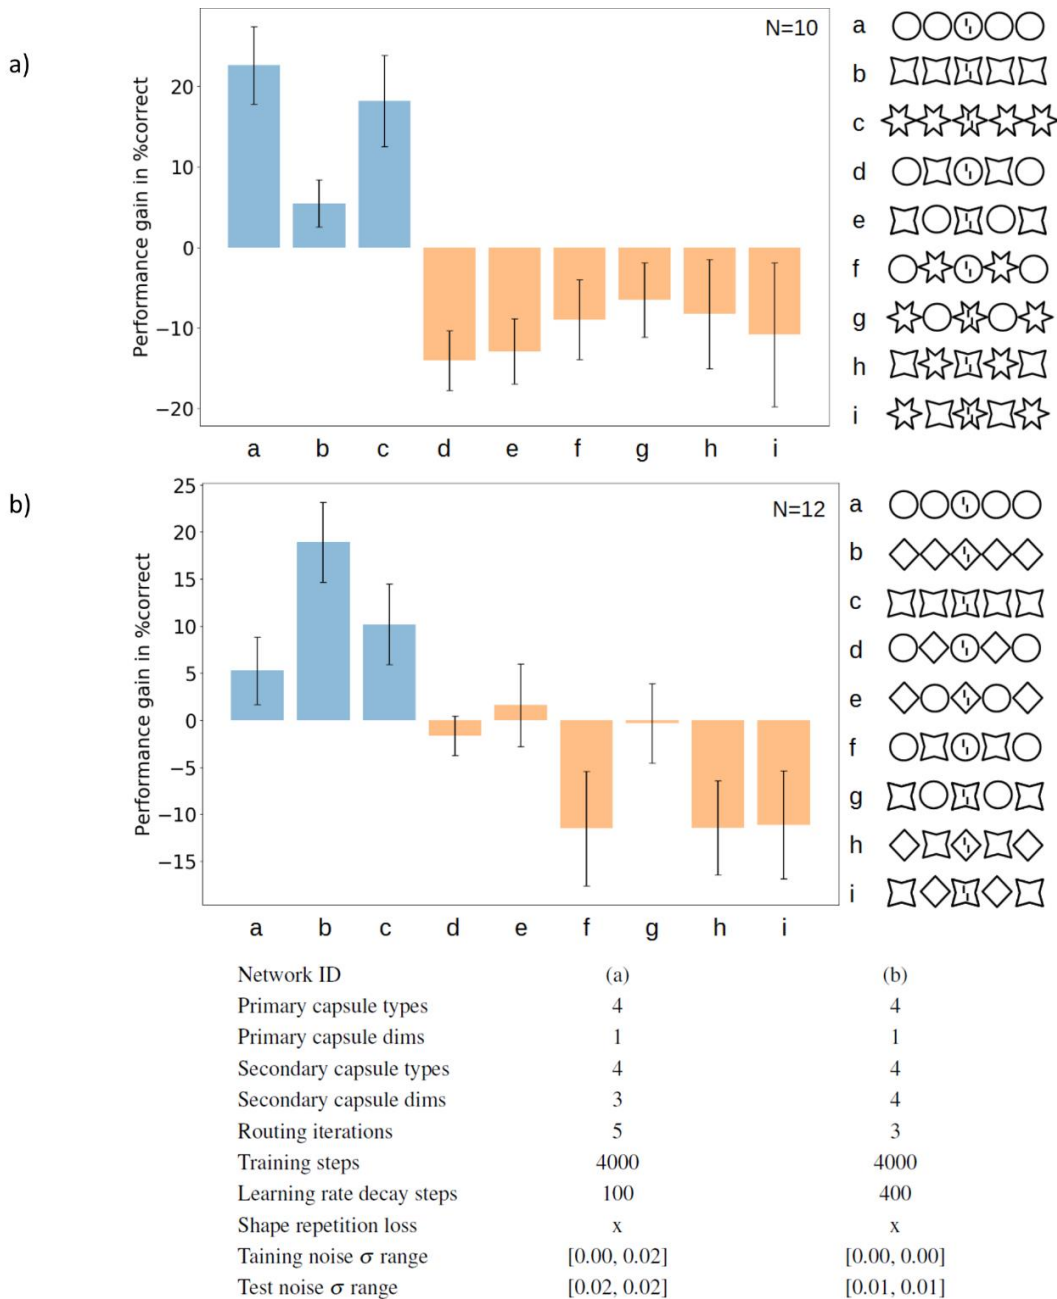

561



562 **Supplementary Figure 1: Results for 16x72 pixel images.** Both crowding and uncrowding occur similarly to the results in  
 563 figure 2. Plotting conventions are the same as in figure 2. Main hyperparameters are summarized at the bottom. With  
 564 these small images, we often encountered ceiling effects. We trained 20 networks and dropped those that were at  
 565 ceiling (i.e., we dropped networks that were at 100% performance for all conditions).  
 566

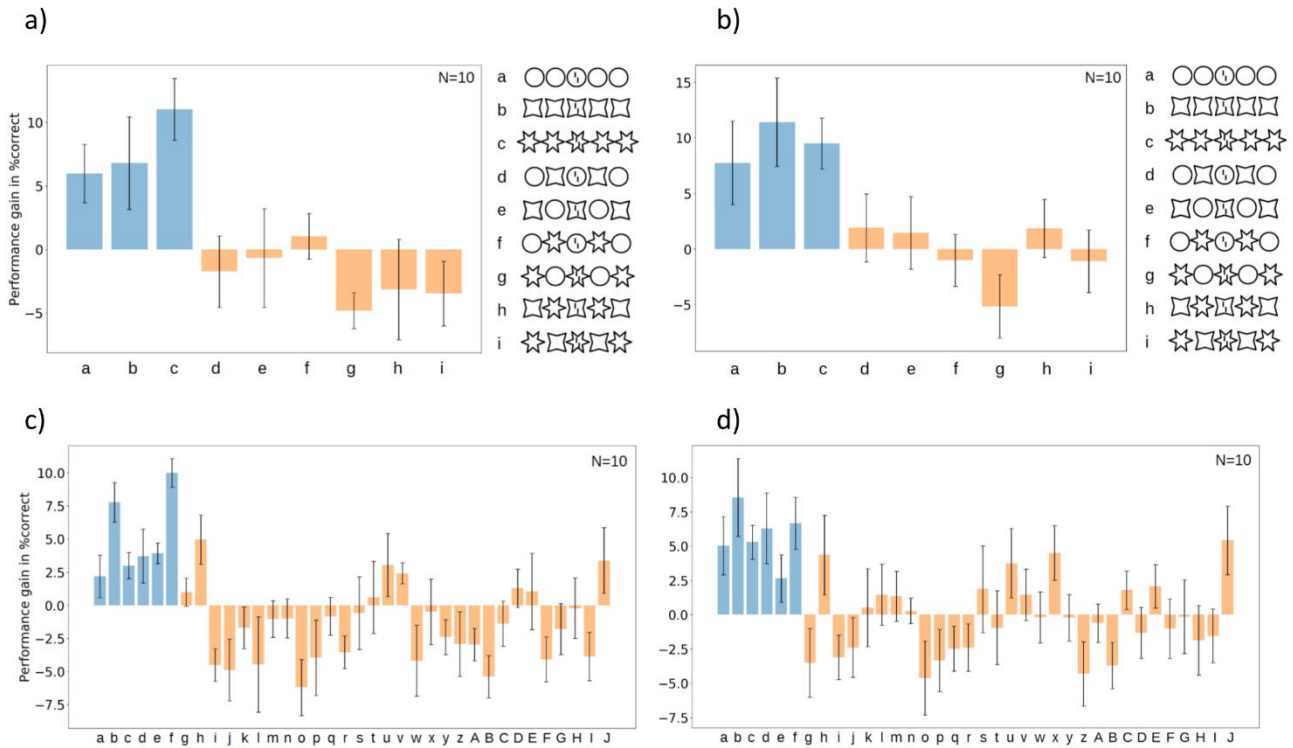

| Network ID              | (a)          | (b)          | (c)          | (d)          |
|-------------------------|--------------|--------------|--------------|--------------|
| Primary capsule types   | 4            | 4            | 7            | 7            |
| Primary capsule dims    | 1            | 1            | 2            | 2            |
| Secondary capsule types | 4            | 4            | 7            | 7            |
| Secondary capsule dims  | 4            | 4            | 8            | 10           |
| Routing iterations      | 3            | 5            | 3            | 3            |
| Training steps          | 8000         | 6000         | 2500         | 5000         |
| Shape repetition loss   | x            | x            | x            | x            |
| Location loss           |              |              | x            | x            |
| Reconstruction loss     |              |              | x            | x            |
| Gaussian training noise | [0.00, 0.05] | [0.00, 0.00] | [0.02, 0.04] | [0.02, 0.04] |
| Gaussian test noise     | [0.05, 0.05] | [0.05, 0.05] | [0.04, 0.06] | [0.04, 0.06] |

567  
 568 **Supplementary Figure 2: 20x72 pixel images.** Both crowding and uncrowding occur similarly to the results in figure 2.  
 569 Plotting conventions are the same as in figure 2. Main hyperparameters are summarized at the bottom. Stimuli not  
 570 shown for panels b&c, for clarity.



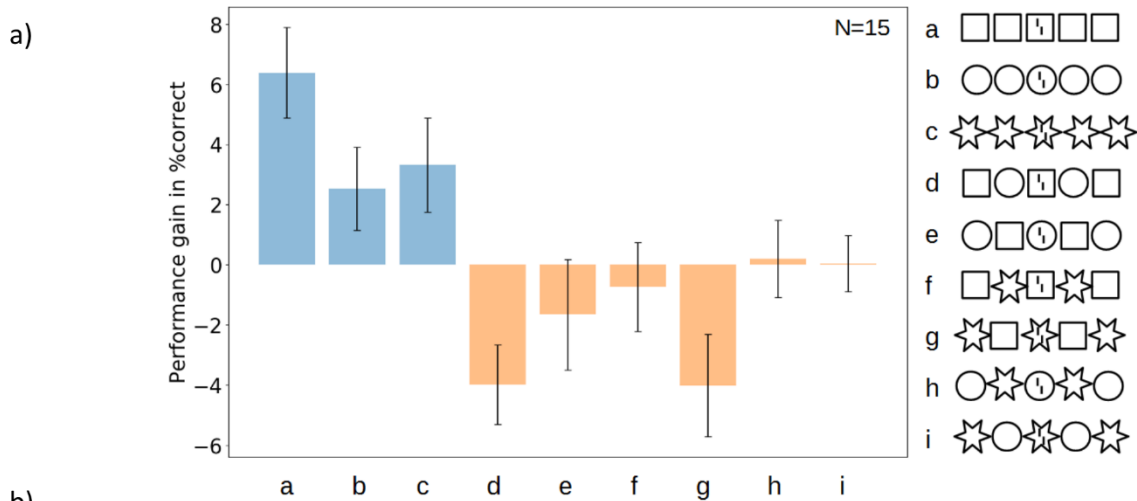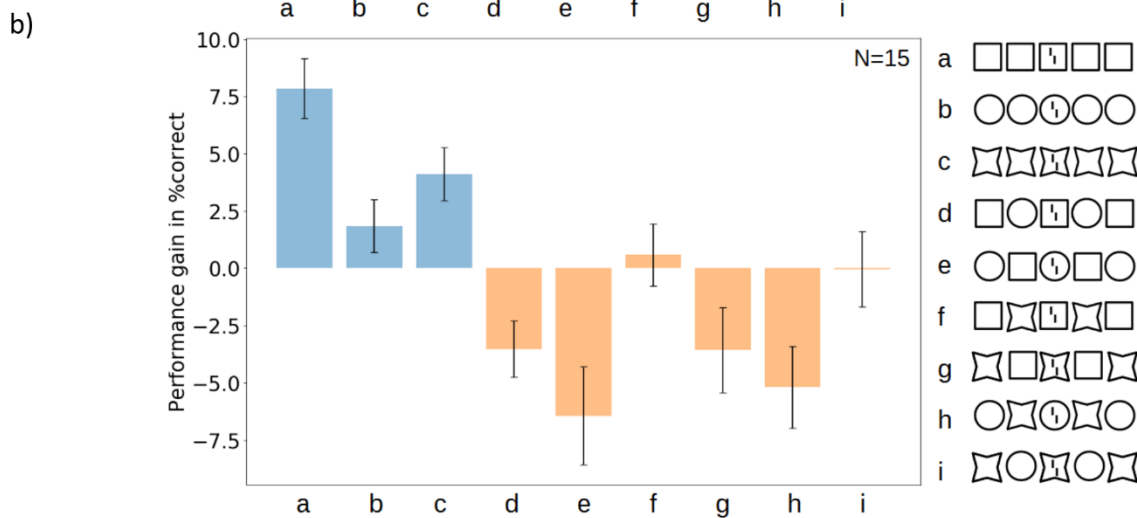

| Network ID              | (a)          | (b)          |
|-------------------------|--------------|--------------|
| Primary capsule types   | 20           | 20           |
| Primary capsule dims    | 1            | 1            |
| Secondary capsule types | 4            | 4            |
| Secondary capsule dims  | 12           | 12           |
| Routing iterations      | 4            | 5            |
| Training steps          | 3000         | 3000         |
| First decay steps       | 500          | 500          |
| Shape repetition loss   | x            | x            |
| Gaussian training noise | [0.00, 0.00] | [0.00, 0.02] |
| Gaussian test noise     | [0.01, 0.01] | [0.01, 0.01] |

571

572 **Supplementary Figure 3: 30x72 pixel images.** Both crowding and uncrowding occur similarly to the results in figure 2.

573 Plotting conventions are the same as in figure 2. Main hyperparameters are summarized at the bottom.

574

575 *Performance deterioration is due to crowding*

576 As a control to check that performance dropped because of crowding and not merely because of the

577 simultaneous presentation of a vernier target and another shape, we measured performance when

578 the vernier was presented outside, rather than inside, flanking shapes. Performance does not drop in

579 this case, compared to when the vernier is presented alone. This suggests that performance drops  
580 because of crowding in the networks.

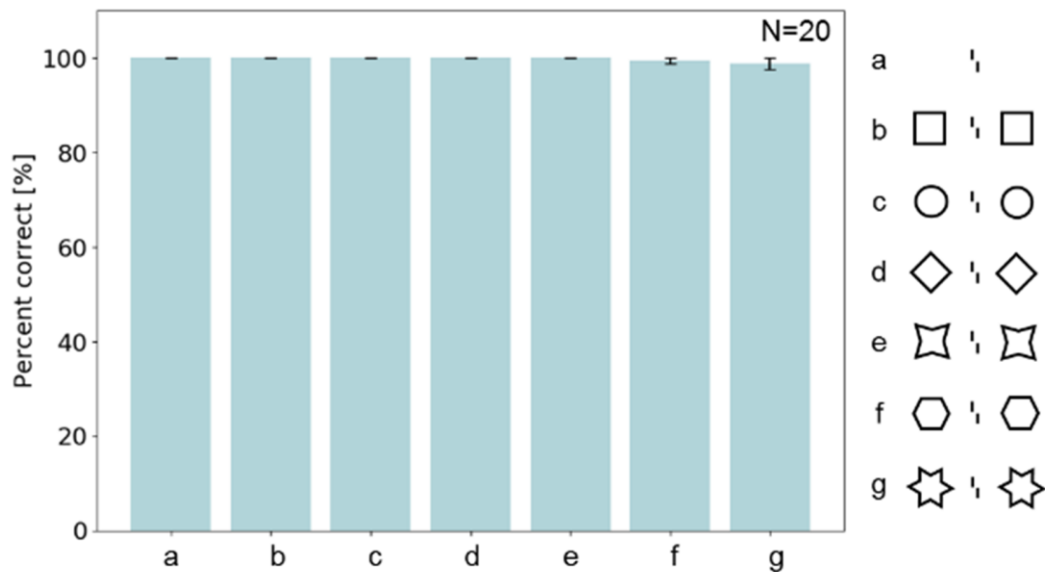

581

582 **Supplementary Figure 4: Performance deterioration is due to crowding.** The x-axis shows different conditions shown on  
583 the right, the y-axis shows vernier offset discrimination percent correct. Vernier accuracy does not decrease when the  
584 vernier is presented outside flanking shapes compared to the vernier alone condition.

585

## 586 Experiment 2

587 *Results are robust against stimuli and hyperparameters changes*

588 To avoid cherry-picking our hyperparameters, we ran several networks with different hyperparameter  
589 sets, and show that our results are robust with respect to these changes.

590 The results of experiment 2 remain qualitatively similar for different network hyperparameters. Below  
591 is a selection of results using different sets of hyperparameters. In both these cases, performance on  
592 the cuboids condition, but not the lines condition, drastically improves with the number of recurrent  
593 routing by agreement iterations (network a: lines:  $p = 0.041$  vs. cuboids  $p = .0.0005$ , network b: lines:  
594  $0.11$  vs. cuboids  $p=0.006$ ). In network a, the lines show a marginally significant improvement, but the  
595 p-value is 100 times smaller than for the cuboids.

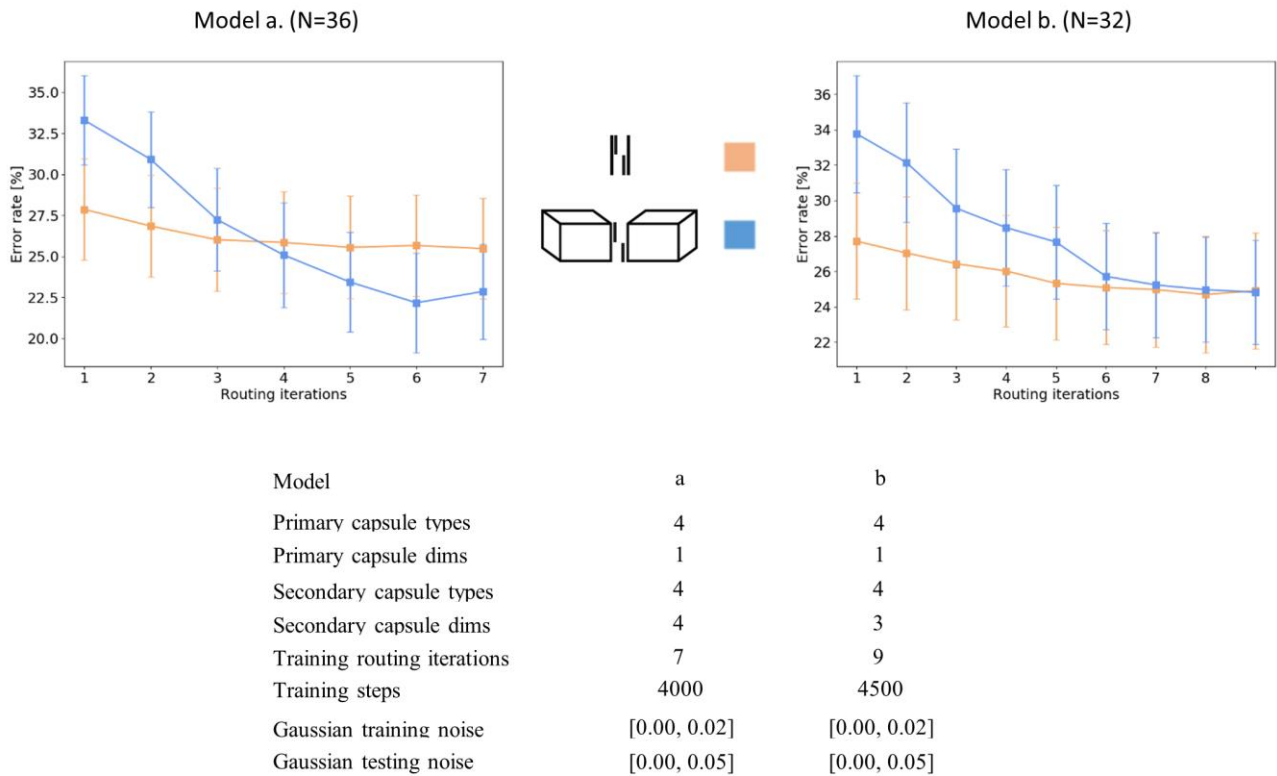

596

597 **Supplementary Figure 5: Experiment 2 results are reproduced with different network hyperparameters.** The x-axis shows  
 598 different numbers of routing iterations during testing and the y-axis shows the corresponding error rates (i.e., lower values  
 599 indicate better performance). Error bars indicate standard deviation across N trained networks (see Methods).  
 600 Performance increases drastically with recurrent routing iterations only for the cuboids condition, and not for the lines  
 601 condition. A difference with the results shown in figure 3 is that performance with cuboids flankers is worse than  
 602 performance with line flankers at early iterations. This may be explained by the far greater amount of pixels in cuboids  
 603 than lines, increasing the interference between the cuboids and the vernier until the cuboids are segmented away. As the  
 604 results exhibited in Figure 3 show, this effect can be mitigated through adequate hyperparameter choice. However, in this  
 605 experiment, we focused on demonstrating that only the cuboids benefit from additional routing iterations, and this result  
 606 is very stable across hyperparameter changes.
